# Supplementary material
Source: PubMed Central journal article supplement (PMC6067965)
Supplement: NIHMS962640-supplement-supplement_1.pdf [file NIHMS962640-supplement-supplement_1.pdf]

Supplementary figure 1 Proportion of flexible sigmoidoscopies among all endoscopies performed in the study participants in the NHS (1992-2012), NHS2 (1989-2011), and HPFS (1992-2010)<sup>a</sup>

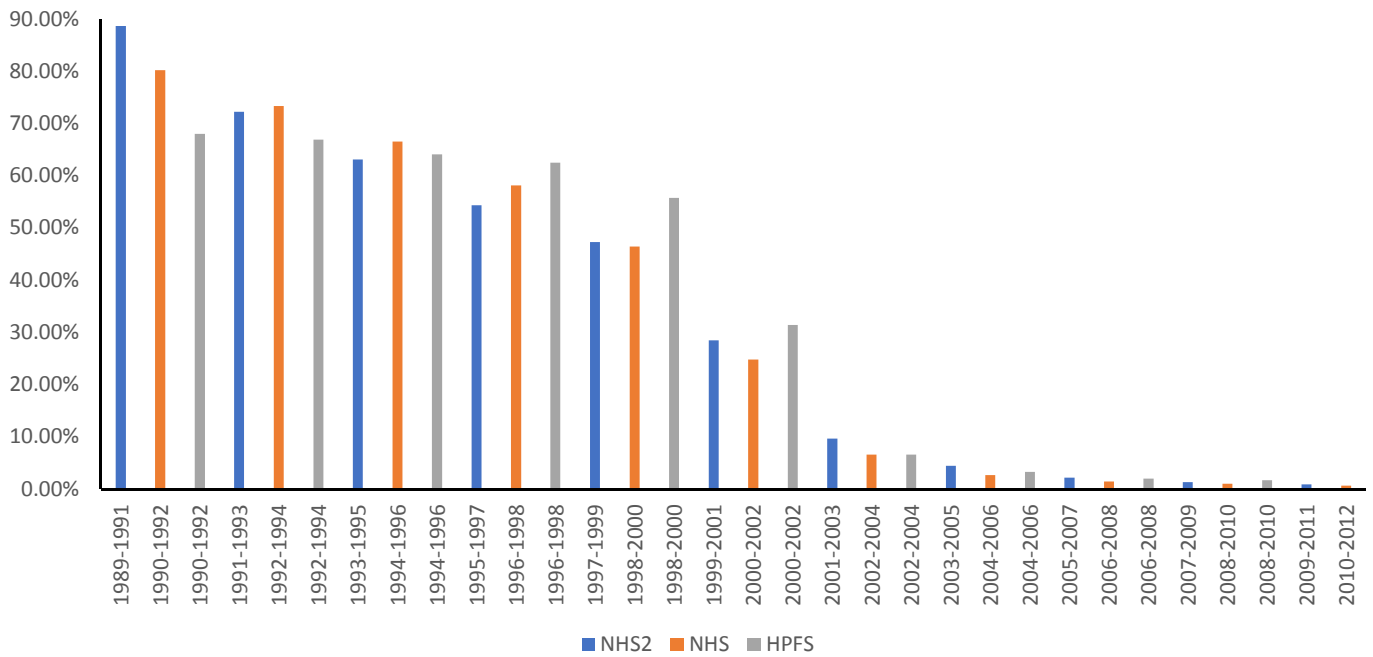

Abbreviations: NHS2, the Nurses' Health Study 2; NHS, the Nurses' Health Study; HPFS, the Health Professionals Follow-up Study.  
<sup>a</sup> Proportion of flexible sigmoidoscopies among all endoscopies was presented. A greater proportion of flexible sigmoidoscopies was performed in the earlier years than in the latter years.

**Supplementary Table 1** Basic characteristics of study participants in the three cohort studies (NHS, NHS2, HPFS)<sup>a</sup>

|                                                | Population before excluding missing data | Population after excluding missing data |
|------------------------------------------------|------------------------------------------|-----------------------------------------|
| No. of participants                            | 165939                                   | 141143                                  |
| Age, year                                      | 60.4±10.6                                | 60.2±10.6                               |
| Sex                                            |                                          |                                         |
| Male                                           | 30880 (19)                               | 28711 (20)                              |
| Female                                         | 135059 (81)                              | 112432 (80)                             |
| Race                                           |                                          |                                         |
| Caucasian                                      | 155701 (94)                              | 134001 (95)                             |
| non-Caucasian                                  | 10238 (6)                                | 7142 (5)                                |
| Family history of colorectal cancer            |                                          |                                         |
| No                                             | 131092 (79)                              | 111461 (79)                             |
| Yes                                            | 34847 (21)                               | 29682 (21)                              |
| Pack-years of smoking                          | 9.2±15.7                                 | 8.8±15.4                                |
| Never smokers                                  | 88247 (53)                               | 76767 (55)                              |
| Past smokers                                   |                                          |                                         |
| <30 pack-years                                 | 55208 (33)                               | 46408 (33)                              |
| ≥30 pack-years                                 | 12777 (8)                                | 10459 (7)                               |
| Current smokers                                |                                          |                                         |
| <30 pack-years                                 | 4331 (3)                                 | 3289 (2)                                |
| ≥30 pack-years                                 | 5376 (3)                                 | 4220 (3)                                |
| Body mass index, kg/m <sup>2</sup>             | 26.6±5.3                                 | 26.6±5.3                                |
| <25                                            | 72930 (44)                               | 62286 (44)                              |
| 25-29.9                                        | 58311 (35)                               | 49725 (35)                              |
| 30-34.9                                        | 22734 (14)                               | 19153 (14)                              |
| ≥35                                            | 11964 (7)                                | 9979 (7)                                |
| Physical activity, MET-hours/week <sup>b</sup> | 21.8±21.0                                | 21.8±20.7                               |
| <7.5                                           | 38549 (24)                               | 31786 (22)                              |
| 7.5-14.9                                       | 40273 (24)                               | 34580 (25)                              |
| 15-29.9                                        | 48321 (29)                               | 41637 (30)                              |
| 30-59.9                                        | 30234 (18)                               | 25956 (18)                              |
| ≥60                                            | 8562 (5)                                 | 7184 (5)                                |
| Alcohol intake, g/day                          | 6.3±9.3                                  | 6.3±9.3                                 |
| Height, cm                                     | 167.2±8.8                                | 167.5±8.7                               |
| Regular aspirin use <sup>c</sup>               |                                          |                                         |
| No                                             | 108806 (66)                              | 91616 (65)                              |
| Yes                                            | 57133 (34)                               | 49527 (35)                              |
| Total fiber intake, g/day                      | 19.5±5.5                                 | 19.6±5.4                                |
| Total folate intake, µg/day                    | 530±218                                  | 527±212                                 |
| Calcium intake, mg/day                         | 1090±405                                 | 1086±392                                |
| Vitamin D intake, IU/day                       | 416±220                                  | 415±214                                 |
| Marine omega-3 fatty acid intake, g/day        | 0.25±0.20                                | 0.25±0.20                               |
| Processed red meat intake, serving/week        | 1.70±1.68                                | 1.68±1.60                               |

Abbreviations: NHS, the Nurses' Health Study; NHS2, the Nurses' Health Study 2; HPFS, the Health Professionals Follow-up Study; MET, metabolic equivalent task.

<sup>a</sup> The presented data are based on repeatedly collected information for each participant up to polyp diagnosis (for cases) or the end of follow-up period (for controls). All variables are adjusted for age and sex except for age and sex themselves. Cumulative average values across person-endoscopies are presented. Mean ±SD is presented for continuous variables and number of participants (percentage) for categorical variables.

<sup>b</sup> Physical activity is represented by the product sum of the MET of each specific recreational activity and hours spent on that activity per week.

<sup>c</sup> A standard tablet contains 325 mg aspirin, and regular users were defined as those who used at least two tablets per week.

**Supplementary table 2** Multivariable associations of CRC risk factors with risk of SPs and conventional adenomas in the NHS <sup>a</sup>

| Risk factor                                | Case-control comparison   |          |                 |                            |                 | Case-case comparison<br>(SPs-only compared to<br>conventional adenomas-<br>only) OR (95% CI) | Synchronous SPs and<br>conventional adenomas |                 |
|--------------------------------------------|---------------------------|----------|-----------------|----------------------------|-----------------|----------------------------------------------------------------------------------------------|----------------------------------------------|-----------------|
|                                            | Non-polyp                 | SPs-only |                 | conventional adenomas-only |                 |                                                                                              | n                                            | OR (95% CI)     |
|                                            | No. of person-endoscopies | n        | OR (95% CI)     | n                          | OR (95% CI)     |                                                                                              |                                              |                 |
| <b>Family history of colorectal cancer</b> |                           |          |                 |                            |                 |                                                                                              |                                              |                 |
| No                                         | 109532                    | 2077     | 1(ref)          | 2481                       | 1(ref)          | 1(ref)                                                                                       | 659                                          | 1(ref)          |
| Yes                                        | 35339                     | 881      | 1.52(1.40-1.64) | 988                        | 1.44(1.33-1.55) | 1.04(0.93-1.17)                                                                              | 266                                          | 1.50(1.30-1.73) |
| <i>P</i>                                   |                           |          | <.001           |                            | <.001           | .45                                                                                          |                                              | <.001           |
| <b>Smoking status</b>                      |                           |          |                 |                            |                 |                                                                                              |                                              |                 |
| Never                                      | 70344                     | 1166     | 1(ref)          | 1639                       | 1(ref)          | 1(ref)                                                                                       | 330                                          | 1(ref)          |
| Past smokers                               |                           |          |                 |                            |                 |                                                                                              |                                              |                 |
| <30 pack-years                             | 53252                     | 1084     | 1.22(1.12-1.33) | 1240                       | 1.01(0.93-1.09) | 1.21(1.08-1.36)                                                                              | 328                                          | 1.32(1.13-1.54) |
| ≥30 pack-years                             | 14304                     | 406      | 1.68(1.50-1.90) | 399                        | 1.11(0.99-1.24) | 1.52(1.29-1.79)                                                                              | 154                                          | 1.99(1.63-2.43) |
| Current smokers                            |                           |          |                 |                            |                 |                                                                                              |                                              |                 |
| <30 pack-years                             | 1437                      | 41       | 1.51(1.10-2.08) | 32                         | 0.91(0.64-1.30) | 1.63(1.00-2.64)                                                                              | 16                                           | 2.51(1.51-4.16) |
| ≥30 pack-years                             | 5534                      | 261      | 2.52(2.19-2.90) | 159                        | 1.07(0.91-1.27) | 2.33(1.88-2.89)                                                                              | 97                                           | 3.50(2.77-4.42) |
| <i>P</i> for trend                         |                           |          | <.001           |                            | .03             | <.001                                                                                        |                                              | <.001           |
| <b>Body mass index, kg/m<sup>2</sup></b>   |                           |          |                 |                            |                 |                                                                                              |                                              |                 |
| <25                                        | 65274                     | 1155     | 1(ref)          | 1448                       | 1(ref)          | 1(ref)                                                                                       | 329                                          | 1(ref)          |
| 25-29.9                                    | 49391                     | 1074     | 1.23(1.13-1.34) | 1246                       | 1.15(1.06-1.24) | 1.08(0.97-1.22)                                                                              | 329                                          | 1.34(1.15-1.56) |
| 30-34.9                                    | 20954                     | 488      | 1.32(1.18-1.47) | 546                        | 1.20(1.08-1.33) | 1.11(0.95-1.29)                                                                              | 179                                          | 1.76(1.46-2.12) |
| ≥35                                        | 9252                      | 241      | 1.41(1.22-1.63) | 229                        | 1.12(0.97-1.30) | 1.29(1.05-1.58)                                                                              | 88                                           | 1.95(1.53-2.48) |
| <i>P</i> for trend                         |                           |          | <.001           |                            | .002            | .001                                                                                         |                                              | <.001           |
| <b>Physical activity, MET-hours/week</b>   |                           |          |                 |                            |                 |                                                                                              |                                              |                 |
| <7.5                                       | 38505                     | 826      | 1(ref)          | 977                        | 1(ref)          | 1(ref)                                                                                       | 271                                          | 1(ref)          |
| 7.5-14.9                                   | 40052                     | 872      | 1.13(1.03-1.25) | 992                        | 1.05(0.96-1.15) | 1.10(0.96-1.26)                                                                              | 248                                          | 1.00(0.84-1.20) |
| 15-29.9                                    | 42478                     | 813      | 1.05(0.95-1.16) | 952                        | 0.98(0.89-1.07) | 1.09(0.95-1.25)                                                                              | 273                                          | 1.12(0.94-1.33) |
| 30-59.9                                    | 20073                     | 379      | 1.07(0.95-1.22) | 474                        | 1.05(0.94-1.18) | 1.06(0.89-1.26)                                                                              | 114                                          | 1.06(0.84-1.32) |
| ≥60                                        | 3763                      | 68       | 1.06(0.82-1.36) | 74                         | 0.89(0.70-1.14) | 1.25(0.88-1.78)                                                                              | 19                                           | 1.00(0.62-1.60) |
| <i>P</i> for trend                         |                           |          | .68             |                            | .68             | .31                                                                                          |                                              | .56             |
| <b>Alcohol intake, g/day</b>               |                           |          |                 |                            |                 |                                                                                              |                                              |                 |
| Never                                      | 26257                     | 487      | 1(ref)          | 620                        | 1(ref)          | 1(ref)                                                                                       | 133                                          | 1(ref)          |
| <3.5                                       | 57742                     | 1154     | 1.07(0.96-1.19) | 1347                       | 1.03(0.94-1.14) | 1.01(0.88-1.17)                                                                              | 359                                          | 1.24(1.02-1.52) |
| 3.5-6.9                                    | 21088                     | 438      | 1.14(1.00-1.30) | 499                        | 1.08(0.96-1.22) | 1.04(0.87-1.24)                                                                              | 153                                          | 1.54(1.22-1.95) |
| ≥7                                         | 39784                     | 879      | 1.17(1.04-1.31) | 1003                       | 1.14(1.02-1.26) | 1.01(0.86-1.18)                                                                              | 280                                          | 1.41(1.14-1.75) |
| <i>P</i> for trend                         |                           |          | .01             |                            | .008            | .98                                                                                          |                                              | .01             |
| <b>Height, per 10cm</b>                    |                           |          |                 |                            |                 |                                                                                              |                                              |                 |
|                                            | 144871                    | 2958     | 1.06(1.00-1.12) | 3469                       | 1.09(1.03-1.15) | 0.97(0.90-1.05)                                                                              | 925                                          | 1.13(1.02-1.26) |
| <i>P</i> for trend                         |                           |          | .06             |                            | .002            | .50                                                                                          |                                              | .03             |
| <b>Regular aspirin use</b>                 |                           |          |                 |                            |                 |                                                                                              |                                              |                 |
| No                                         | 80998                     | 1705     | 1(ref)          | 1961                       | 1(ref)          | 1(ref)                                                                                       | 540                                          | 1(ref)          |
| Yes                                        | 63873                     | 1253     | 0.92(0.86-1.00) | 1508                       | 0.94(0.88-1.01) | 0.98(0.89-1.08)                                                                              | 385                                          | 0.83(0.73-0.95) |
| <i>P</i>                                   |                           |          | .04             |                            | .09             | .70                                                                                          |                                              | .006            |

|                                         |       |     |                 |      |                 |                 |     |                 |  |
|-----------------------------------------|-------|-----|-----------------|------|-----------------|-----------------|-----|-----------------|--|
| <b>Total fiber intake</b>               |       |     |                 |      |                 |                 |     |                 |  |
| Quartile 1                              | 35924 | 894 | 1(ref)          | 948  | 1(ref)          | 1(ref)          | 270 | 1(ref)          |  |
| Quartile 2                              | 36190 | 787 | 1.01(0.91-1.11) | 851  | 0.95(0.87-1.05) | 1.07(0.94-1.23) | 236 | 0.98(0.82-1.17) |  |
| Quartile 3                              | 36220 | 708 | 0.99(0.90-1.10) | 888  | 1.04(0.94-1.14) | 0.97(0.84-1.11) | 224 | 1.00(0.83-1.21) |  |
| Quartile 4                              | 36537 | 569 | 0.87(0.77-0.97) | 782  | 0.94(0.85-1.04) | 0.93(0.79-1.08) | 195 | 0.93(0.76-1.14) |  |
| <i>P</i> for trend                      |       |     | .02             |      | .48             | .20             |     | .55             |  |
| <b>Total folate intake</b>              |       |     |                 |      |                 |                 |     |                 |  |
| Quartile 1                              | 35860 | 888 | 1(ref)          | 986  | 1(ref)          | 1(ref)          | 280 | 1(ref)          |  |
| Quartile 2                              | 36030 | 807 | 1.04(0.94-1.14) | 936  | 1.02(0.93-1.12) | 1.01(0.89-1.16) | 259 | 0.99(0.83-1.18) |  |
| Quartile 3                              | 36305 | 710 | 0.99(0.89-1.09) | 825  | 0.95(0.87-1.05) | 1.04(0.90-1.20) | 222 | 0.90(0.75-1.08) |  |
| Quartile 4                              | 36676 | 553 | 0.82(0.74-0.92) | 722  | 0.87(0.78-0.96) | 0.95(0.82-1.11) | 164 | 0.70(0.57-0.86) |  |
| <i>P</i> for trend                      |       |     | <.001           |      | .002            | .61             |     | <.001           |  |
| <b>Total calcium intake</b>             |       |     |                 |      |                 |                 |     |                 |  |
| Quartile 1                              | 35910 | 844 | 1(ref)          | 975  | 1(ref)          | 1(ref)          | 288 | 1(ref)          |  |
| Quartile 2                              | 36100 | 794 | 1.03(0.94-1.14) | 923  | 1.00(0.91-1.10) | 1.03(0.90-1.18) | 226 | 0.84(0.70-1.00) |  |
| Quartile 3                              | 36270 | 717 | 1.02(0.92-1.14) | 852  | 0.98(0.89-1.08) | 1.05(0.91-1.20) | 231 | 0.93(0.78-1.11) |  |
| Quartile 4                              | 36591 | 603 | 0.95(0.85-1.07) | 719  | 0.87(0.79-0.97) | 1.11(0.95-1.29) | 180 | 0.78(0.64-0.94) |  |
| <i>P</i> for trend                      |       |     | .39             |      | .009            | .18             |     | .03             |  |
| <b>Total vitamin D intake</b>           |       |     |                 |      |                 |                 |     |                 |  |
| Quartile 1                              | 35847 | 880 | 1(ref)          | 1022 | 1(ref)          | 1(ref)          | 264 | 1(ref)          |  |
| Quartile 2                              | 36073 | 798 | 0.99(0.90-1.09) | 910  | 0.94(0.85-1.03) | 1.06(0.93-1.21) | 267 | 1.07(0.90-1.27) |  |
| Quartile 3                              | 36292 | 717 | 0.96(0.86-1.06) | 832  | 0.90(0.82-0.99) | 1.07(0.93-1.23) | 216 | 0.92(0.76-1.10) |  |
| Quartile 4                              | 36659 | 563 | 0.81(0.72-0.90) | 705  | 0.79(0.71-0.87) | 1.03(0.89-1.19) | 178 | 0.90(0.65-0.97) |  |
| <i>P</i> for trend                      |       |     | <.001           |      | <.001           | .71             |     | .007            |  |
| <b>Marine omega-3 fatty acid intake</b> |       |     |                 |      |                 |                 |     |                 |  |
| Quartile 1                              | 36036 | 821 | 1(ref)          | 917  | 1(ref)          | 1(ref)          | 244 | 1(ref)          |  |
| Quartile 2                              | 36236 | 771 | 0.96(0.87-1.06) | 936  | 1.05(0.96-1.15) | 0.91(0.79-1.04) | 222 | 0.93(0.78-1.12) |  |
| Quartile 3                              | 36137 | 746 | 0.96(0.87-1.06) | 857  | 0.99(0.90-1.09) | 0.94(0.82-1.08) | 230 | 1.00(0.83-1.20) |  |
| Quartile 4                              | 36462 | 620 | 0.82(0.73-0.91) | 759  | 0.90(0.82-1.00) | 0.89(0.77-1.03) | 229 | 1.02(0.85-1.22) |  |
| <i>P</i> for trend                      |       |     | .001            |      | .03             | .17             |     | .71             |  |
| <b>Processed red meat intake</b>        |       |     |                 |      |                 |                 |     |                 |  |
| Quartile 1                              | 36362 | 573 | 1(ref)          | 770  | 1(ref)          | 1(ref)          | 203 | 1(ref)          |  |
| Quartile 2                              | 36283 | 767 | 1.27(1.14-1.42) | 896  | 1.14(1.03-1.26) | 1.11(0.96-1.29) | 228 | 1.05(0.87-1.28) |  |
| Quartile 3                              | 36221 | 783 | 1.21(1.09-1.36) | 875  | 1.08(0.98-1.20) | 1.11(0.96-1.29) | 239 | 1.04(0.86-1.26) |  |
| Quartile 4                              | 36005 | 835 | 1.21(1.08-1.35) | 928  | 1.10(1.00-1.22) | 1.08(0.93-1.25) | 255 | 1.02(0.84-1.24) |  |
| <i>P</i> for trend                      |       |     | .03             |      | .22             | .62             |     | .95             |  |

Abbreviations: CRC, colorectal cancer; SP, serrated polyp; NHS, the Nurses' Health Study; OR, odd ratio; CI, confidence interval; MET, metabolic equivalent task.

<sup>a</sup> Multivariable logistic regression model was used with adjustment for time period of endoscopy (in 2-year intervals), number of prior endoscopies (continuous), time in years since the most recent endoscopy (continuous), reason for endoscopy (routine screening or symptom), race (Caucasian or non-Caucasian), age (continuous, per 10 years), family history of colorectal cancer (yes or no), pack-years of smoking (continuous), body mass index (continuous), physical activity (median in each category), alcohol consumption (median in each category), height (continuous, per 10 cm), regular aspirin use (yes or no). For dietary factors, test for trend was conducted using the median of each quartile as a continuous variable.

**Supplementary table 3** Multivariable associations of CRC risk factors with risk of SPs and conventional adenomas in the NHS2 <sup>a</sup>

| Risk factor                                | Case-control comparison   |          |                 |                            |                 | Case-case comparison<br>(SPs-only compared to<br>conventional adenomas-<br>only) OR (95% CI) | Synchronous SPs and<br>conventional adenomas |                 |
|--------------------------------------------|---------------------------|----------|-----------------|----------------------------|-----------------|----------------------------------------------------------------------------------------------|----------------------------------------------|-----------------|
|                                            | Non-polyp                 | SPs-only |                 | conventional adenomas-only |                 |                                                                                              | n                                            | OR (95% CI)     |
|                                            | No. of person-endoscopies | n        | OR (95% CI)     | n                          | OR (95% CI)     |                                                                                              |                                              |                 |
| <b>Family history of colorectal cancer</b> |                           |          |                 |                            |                 |                                                                                              |                                              |                 |
| No                                         | 91827                     | 2597     | 1(ref)          | 2209                       | 1(ref)          | 1(ref)                                                                                       | 514                                          | 1(ref)          |
| Yes                                        | 21258                     | 769      | 1.56(1.43-1.70) | 602                        | 1.51(1.37-1.66) | 0.98(0.86-1.11)                                                                              | 168                                          | 1.89(1.58-2.26) |
| <i>P</i>                                   |                           |          | <.001           |                            | <.001           | .71                                                                                          |                                              | <.001           |
| <b>Smoking status</b>                      |                           |          |                 |                            |                 |                                                                                              |                                              |                 |
| Never                                      | 73525                     | 1851     | 1(ref)          | 1810                       | 1(ref)          | 1(ref)                                                                                       | 351                                          | 1(ref)          |
| Past smokers                               |                           |          |                 |                            |                 |                                                                                              |                                              |                 |
| <30 pack-years                             | 30765                     | 1026     | 1.29(1.20-1.40) | 750                        | 0.99(0.90-1.08) | 1.29(1.14-1.45)                                                                              | 211                                          | 1.32(1.10-1.57) |
| ≥30 pack-years                             | 1503                      | 58       | 1.53(1.16-2.00) | 48                         | 1.24(0.92-1.66) | 1.22(0.83-1.80)                                                                              | 18                                           | 2.17(1.33-3.51) |
| Current smokers                            |                           |          |                 |                            |                 |                                                                                              |                                              |                 |
| <30 pack-years                             | 4947                      | 272      | 2.02(1.77-2.30) | 131                        | 1.06(0.89-1.27) | 1.86(1.49-2.32)                                                                              | 54                                           | 2.15(1.60-2.88) |
| ≥30 pack-years                             | 2345                      | 159      | 2.57(2.17-3.05) | 72                         | 1.14(0.89-1.45) | 2.13(1.59-2.84)                                                                              | 48                                           | 3.76(2.74-5.15) |
| <i>P</i> for trend                         |                           |          | <.001           |                            | .07             | <.001                                                                                        |                                              | <.001           |
| <b>Body mass index, kg/m<sup>2</sup></b>   |                           |          |                 |                            |                 |                                                                                              |                                              |                 |
| <25                                        | 51762                     | 1360     | 1(ref)          | 1237                       | 1(ref)          | 1(ref)                                                                                       | 261                                          | 1(ref)          |
| 25-29.9                                    | 32385                     | 991      | 1.19(1.09-1.29) | 828                        | 1.04(0.95-1.14) | 1.12(0.99-1.27)                                                                              | 207                                          | 1.26(1.05-1.52) |
| 30-34.9                                    | 16530                     | 608      | 1.46(1.32-1.62) | 425                        | 1.05(0.93-1.17) | 1.38(1.19-1.60)                                                                              | 111                                          | 1.38(1.10-1.73) |
| ≥35                                        | 12408                     | 407      | 1.33(1.18-1.49) | 321                        | 1.05(0.93-1.20) | 1.23(1.04-1.47)                                                                              | 103                                          | 1.79(1.41-2.27) |
| <i>P</i> for trend                         |                           |          | <.001           |                            | .15             | .002                                                                                         |                                              | <.001           |
| <b>Physical activity, MET-hours/week</b>   |                           |          |                 |                            |                 |                                                                                              |                                              |                 |
| <7.5                                       | 27336                     | 793      | 1(ref)          | 711                        | 1(ref)          | 1(ref)                                                                                       | 159                                          | 1(ref)          |
| 7.5-14.9                                   | 28681                     | 957      | 1.20(1.09-1.33) | 778                        | 1.05(0.95-1.17) | 1.15(1.00-1.33)                                                                              | 189                                          | 1.18(0.95-1.46) |
| 15-29.9                                    | 33050                     | 955      | 1.06(0.96-1.17) | 787                        | 0.93(0.84-1.03) | 1.17(1.01-1.35)                                                                              | 195                                          | 1.07(0.87-1.33) |
| 30-59.9                                    | 18454                     | 524      | 1.06(0.94-1.18) | 437                        | 0.94(0.83-1.06) | 1.13(0.96-1.34)                                                                              | 111                                          | 1.12(0.87-1.44) |
| ≥60                                        | 5564                      | 137      | 0.91(0.75-1.10) | 98                         | 0.70(0.56-0.87) | 1.34(1.01-1.78)                                                                              | 28                                           | 0.96(0.64-1.45) |
| <i>P</i> for trend                         |                           |          | .10             |                            | <.001           | .07                                                                                          |                                              | .86             |
| <b>Alcohol intake, g/day</b>               |                           |          |                 |                            |                 |                                                                                              |                                              |                 |
| Never                                      | 29585                     | 750      | 1(ref)          | 709                        | 1(ref)          | 1(ref)                                                                                       | 131                                          | 1(ref)          |
| <3.5                                       | 46063                     | 1390     | 1.21(1.11-1.33) | 1152                       | 1.05(0.95-1.15) | 1.16(1.02-1.32)                                                                              | 263                                          | 1.26(1.02-1.56) |
| 3.5-6.9                                    | 16582                     | 506      | 1.24(1.10-1.40) | 411                        | 1.05(0.92-1.19) | 1.19(1.01-1.41)                                                                              | 108                                          | 1.46(1.13-1.90) |
| ≥7                                         | 20855                     | 720      | 1.39(1.25-1.55) | 539                        | 1.10(0.98-1.24) | 1.28(1.09-1.51)                                                                              | 180                                          | 1.89(1.49-2.39) |
| <i>P</i> for trend                         |                           |          | <.001           |                            | .17             | .01                                                                                          |                                              | <.001           |
| <b>Height, per 10cm</b>                    |                           |          |                 |                            |                 |                                                                                              |                                              |                 |
|                                            | 113085                    | 3366     | 1.02(0.97-1.08) | 2811                       | 1.01(0.96-1.07) | 1.00(0.93-1.08)                                                                              | 682                                          | 1.06(0.94-1.19) |
| <i>P</i> for trend                         |                           |          | .43             |                            | .63             | .97                                                                                          |                                              | .35             |
| <b>Regular aspirin use</b>                 |                           |          |                 |                            |                 |                                                                                              |                                              |                 |
| No                                         | 96598                     | 2888     | 1(ref)          | 2417                       | 1(ref)          | 1(ref)                                                                                       | 583                                          | 1(ref)          |
| Yes                                        | 16487                     | 478      | 0.97(0.87-1.07) | 394                        | 0.96(0.86-1.07) | 1.05(0.93-1.19)                                                                              | 99                                           | 0.92(0.74-1.15) |
| <i>P</i>                                   |                           |          | .51             |                            | .49             | .39                                                                                          |                                              | .47             |
| <b>Total fiber intake</b>                  |                           |          |                 |                            |                 |                                                                                              |                                              |                 |

|                                         |       |     |                 |     |                 |                 |     |                 |
|-----------------------------------------|-------|-----|-----------------|-----|-----------------|-----------------|-----|-----------------|
| Quartile 1                              | 28178 | 911 | 1(ref)          | 703 | 1(ref)          | 1(ref)          | 174 | 1(ref)          |
| Quartile 2                              | 28209 | 816 | 0.98(0.89-1.08) | 747 | 1.09(0.98-1.22) | 0.90(0.78-1.03) | 201 | 1.26(1.03-1.55) |
| Quartile 3                              | 28289 | 859 | 1.08(0.98-1.19) | 692 | 1.03(0.93-1.15) | 1.07(0.93-1.24) | 164 | 1.07(0.86-1.33) |
| Quartile 4                              | 28409 | 780 | 1.05(0.95-1.17) | 669 | 1.05(0.94-1.18) | 1.02(0.88-1.19) | 143 | 1.02(0.81-1.28) |
| <i>P</i> for trend                      |       |     | .15             |     | .58             | .39             |     | .72             |
| <b>Total folate intake</b>              |       |     |                 |     |                 |                 |     |                 |
| Quartile 1                              | 28277 | 828 | 1(ref)          | 695 | 1(ref)          | 1(ref)          | 165 | 1(ref)          |
| Quartile 2                              | 28109 | 890 | 1.20(1.08-1.32) | 780 | 1.15(1.03-1.27) | 1.10(0.95-1.27) | 200 | 1.25(1.02-1.55) |
| Quartile 3                              | 28274 | 858 | 1.21(1.09-1.33) | 697 | 1.04(0.94-1.16) | 1.18(1.01-1.36) | 163 | 1.06(0.84-1.32) |
| Quartile 4                              | 28425 | 790 | 1.16(1.05-1.29) | 639 | 1.00(0.90-1.12) | 1.22(1.04-1.42) | 154 | 1.07(0.85-1.34) |
| <i>P</i> for trend                      |       |     | .01             |     | .49             | .01             |     | .98             |
| <b>Total calcium intake</b>             |       |     |                 |     |                 |                 |     |                 |
| Quartile 1                              | 28244 | 818 | 1(ref)          | 715 | 1(ref)          | 1(ref)          | 171 | 1(ref)          |
| Quartile 2                              | 28181 | 921 | 1.20(1.09-1.32) | 725 | 1.02(0.92-1.14) | 1.18(1.02-1.36) | 180 | 1.07(0.87-1.33) |
| Quartile 3                              | 28217 | 897 | 1.23(1.11-1.35) | 688 | 1.00(0.89-1.11) | 1.25(1.08-1.45) | 185 | 1.16(0.94-1.43) |
| Quartile 4                              | 28443 | 730 | 1.08(0.97-1.19) | 683 | 1.03(0.93-1.15) | 1.07(0.92-1.24) | 146 | 0.98(0.78-1.24) |
| <i>P</i> for trend                      |       |     | .22             |     | .65             | .43             |     | .00             |
| <b>Total vitamin D intake</b>           |       |     |                 |     |                 |                 |     |                 |
| Quartile 1                              | 28158 | 894 | 1(ref)          | 737 | 1(ref)          | 1(ref)          | 186 | 1(ref)          |
| Quartile 2                              | 28217 | 873 | 1.03(0.94-1.14) | 728 | 1.00(0.90-1.11) | 1.03(0.89-1.18) | 189 | 1.05(0.86-1.29) |
| Quartile 3                              | 28255 | 848 | 1.05(0.96-1.16) | 715 | 1.01(0.91-1.12) | 1.05(0.91-1.21) | 152 | 0.88(0.71-1.10) |
| Quartile 4                              | 28455 | 751 | 0.97(0.88-1.07) | 631 | 0.92(0.83-1.03) | 1.06(0.91-1.23) | 155 | 0.95(0.77-1.18) |
| <i>P</i> for trend                      |       |     | .60             |     | .15             | .43             |     | .42             |
| <b>Marine omega-3 fatty acid intake</b> |       |     |                 |     |                 |                 |     |                 |
| Quartile 1                              | 28087 | 875 | 1(ref)          | 756 | 1(ref)          | 1(ref)          | 162 | 1(ref)          |
| Quartile 2                              | 28410 | 837 | 0.95(0.86-1.04) | 729 | 0.96(0.86-1.06) | 0.99(0.86-1.14) | 168 | 0.99(0.80-1.23) |
| Quartile 3                              | 27940 | 864 | 1.01(0.92-1.12) | 694 | 0.94(0.84-1.04) | 1.09(0.95-1.26) | 181 | 1.08(0.87-1.34) |
| Quartile 4                              | 28648 | 790 | 0.95(0.86-1.05) | 632 | 0.87(0.78-0.97) | 1.12(0.96-1.30) | 171 | 1.04(0.83-1.29) |
| <i>P</i> for trend                      |       |     | .59             |     | .01             | .07             |     | .59             |
| <b>Processed red meat intake</b>        |       |     |                 |     |                 |                 |     |                 |
| Quartile 1                              | 30878 | 855 | 1(ref)          | 770 | 1(ref)          | 1(ref)          | 158 | 1(ref)          |
| Quartile 2                              | 25768 | 755 | 1.04(0.94-1.15) | 615 | 0.92(0.83-1.03) | 1.11(0.96-1.29) | 167 | 1.18(0.94-1.47) |
| Quartile 3                              | 28187 | 833 | 1.00(0.91-1.11) | 694 | 0.94(0.84-1.04) | 1.06(0.92-1.22) | 184 | 1.14(0.92-1.42) |
| Quartile 4                              | 28252 | 923 | 1.05(0.96-1.16) | 732 | 0.96(0.87-1.07) | 1.09(0.94-1.25) | 173 | 0.98(0.78-1.23) |
| <i>P</i> for trend                      |       |     | .36             |     | .76             | .44             |     | .46             |

Abbreviations: CRC, colorectal cancer; SP, serrated polyp; NHS2, the Nurses' Health Study 2; OR, odd ratio; CI, confidence interval; MET, metabolic equivalent task.

<sup>a</sup> Multivariable logistic regression model was used with adjustment for time period of endoscopy (in 2-year intervals), number of prior endoscopies (continuous), time in years since the most recent endoscopy (continuous), reason for endoscopy (routine screening or symptom), race (Caucasian or non-Caucasian), age (continuous, per 10 years), family history of colorectal cancer (yes or no), pack-years of smoking (continuous), body mass index (continuous), physical activity (median in each category), alcohol consumption (median in each category), height (continuous, per 10 cm), regular aspirin use (yes or no). For dietary factors, test for trend was conducted using the median of each quartile as a continuous variable.

**Supplementary table 4** Multivariable associations of CRC risk factors with risk of SPs and conventional adenomas in the HPFS <sup>a</sup>

| Risk factor                                | Case-control comparison   |          |                 |                            |                 | Case-case comparison<br>(SPs-only compared to<br>conventional adenomas-<br>only) OR (95% CI) | Synchronous SPs and<br>conventional adenomas |                 |
|--------------------------------------------|---------------------------|----------|-----------------|----------------------------|-----------------|----------------------------------------------------------------------------------------------|----------------------------------------------|-----------------|
|                                            | Non-polyp                 | SPs-only |                 | conventional adenomas-only |                 |                                                                                              | n                                            | OR (95% CI)     |
|                                            | No. of person-endoscopies | n        | OR (95% CI)     | n                          | OR (95% CI)     |                                                                                              |                                              |                 |
| <b>Family history of colorectal cancer</b> |                           |          |                 |                            |                 |                                                                                              |                                              |                 |
| No                                         | 61805                     | 1282     | 1(ref)          | 2310                       | 1(ref)          | 1(ref)                                                                                       | 619                                          | 1(ref)          |
| Yes                                        | 12439                     | 339      | 1.49(1.32-1.68) | 622                        | 1.51(1.38-1.66) | 0.96(0.82-1.12)                                                                              | 156                                          | 1.43(1.20-1.71) |
| <i>P</i>                                   |                           |          | <.001           |                            | <.001           | .61                                                                                          |                                              | <.001           |
| <b>Smoking status</b>                      |                           |          |                 |                            |                 |                                                                                              |                                              |                 |
| Never                                      | 37937                     | 698      | 1(ref)          | 1440                       | 1(ref)          | 1(ref)                                                                                       | 283                                          | 1(ref)          |
| Past smokers                               |                           |          |                 |                            |                 |                                                                                              |                                              |                 |
| <30 pack-years                             | 25164                     | 550      | 1.15(1.03-1.30) | 993                        | 1.02(0.93-1.11) | 1.13(0.98-1.31)                                                                              | 298                                          | 1.42(1.21-1.67) |
| ≥30 pack-years                             | 8371                      | 253      | 1.72(1.47-2.01) | 386                        | 1.12(0.99-1.26) | 1.51(1.24-1.83)                                                                              | 124                                          | 1.62(1.29-2.02) |
| Current smokers                            |                           |          |                 |                            |                 |                                                                                              |                                              |                 |
| <30 pack-years                             | 1166                      | 41       | 1.55(1.12-2.15) | 30                         | 0.62(0.43-0.90) | 2.50(1.54-4.08)                                                                              | 20                                           | 1.89(1.19-3.01) |
| ≥30 pack-years                             | 1606                      | 79       | 2.34(1.83-2.99) | 83                         | 1.20(0.95-1.52) | 1.93(1.39-2.67)                                                                              | 50                                           | 3.34(2.45-4.55) |
| <i>P</i> for trend                         |                           |          | <.001           |                            | .04             | <.001                                                                                        |                                              | <.001           |
| <b>Body mass index, kg/m<sup>2</sup></b>   |                           |          |                 |                            |                 |                                                                                              |                                              |                 |
| <25                                        | 30444                     | 569      | 1(ref)          | 1138                       | 1(ref)          | 1(ref)                                                                                       | 242                                          | 1(ref)          |
| 25-29.9                                    | 34823                     | 811      | 1.15(1.03-1.28) | 1396                       | 1.05(0.96-1.13) | 1.10(0.96-1.26)                                                                              | 397                                          | 1.34(1.14-1.57) |
| 30-34.9                                    | 7265                      | 194      | 1.21(1.02-1.44) | 331                        | 1.14(1.00-1.30) | 1.09(0.88-1.34)                                                                              | 104                                          | 1.55(1.22-1.97) |
| ≥35                                        | 1712                      | 47       | 1.24(0.91-1.68) | 67                         | 0.97(0.75-1.25) | 1.27(0.86-1.88)                                                                              | 32                                           | 2.12(1.45-3.10) |
| <i>P</i> for trend                         |                           |          | .002            |                            | .04             | .18                                                                                          |                                              | <.001           |
| <b>Physical activity, MET-hours/week</b>   |                           |          |                 |                            |                 |                                                                                              |                                              |                 |
| <7.5                                       | 8904                      | 207      | 1(ref)          | 371                        | 1(ref)          | 1(ref)                                                                                       | 102                                          | 1(ref)          |
| 7.5-14.9                                   | 12455                     | 298      | 1.09(0.91-1.31) | 537                        | 1.08(0.94-1.24) | 1.04(0.83-1.31)                                                                              | 152                                          | 1.13(0.88-1.46) |
| 15-29.9                                    | 22608                     | 511      | 1.07(0.91-1.27) | 894                        | 1.02(0.90-1.16) | 1.10(0.89-1.36)                                                                              | 250                                          | 1.08(0.85-1.37) |
| 30-59.9                                    | 22574                     | 472      | 1.03(0.87-1.22) | 854                        | 1.00(0.88-1.14) | 1.07(0.87-1.33)                                                                              | 206                                          | 0.92(0.72-1.17) |
| ≥60                                        | 7703                      | 133      | 0.86(0.68-1.07) | 276                        | 0.96(0.82-1.13) | 0.93(0.70-1.22)                                                                              | 65                                           | 0.90(0.65-1.23) |
| <i>P</i> for trend                         |                           |          | .05             |                            | .24             | .56                                                                                          |                                              | .08             |
| <b>Alcohol intake, g/day</b>               |                           |          |                 |                            |                 |                                                                                              |                                              |                 |
| Never                                      | 10621                     | 180      | 1(ref)          | 380                        | 1(ref)          | 1(ref)                                                                                       | 90                                           | 1(ref)          |
| <7                                         | 27849                     | 559      | 1.21(1.02-1.44) | 1114                       | 1.19(1.05-1.34) | 1.03(0.84-1.27)                                                                              | 231                                          | 1.02(0.80-1.31) |
| 7-13.9                                     | 15537                     | 355      | 1.39(1.16-1.67) | 567                        | 1.10(0.96-1.26) | 1.25(0.99-1.56)                                                                              | 151                                          | 1.22(0.93-1.59) |
| ≥14                                        | 20237                     | 527      | 1.50(1.26-1.78) | 871                        | 1.26(1.11-1.43) | 1.18(0.95-1.46)                                                                              | 303                                          | 1.70(1.34-2.17) |
| <i>P</i> for trend                         |                           |          | <.001           |                            | .008            | .05                                                                                          |                                              | <.001           |
| <b>Height, per 10cm</b>                    |                           |          |                 |                            |                 |                                                                                              |                                              |                 |
|                                            | 74244                     | 1621     | 1.05(0.98-1.13) | 2932                       | 0.98(0.93-1.03) | 1.06(0.97-1.17)                                                                              | 775                                          | 1.20(1.09-1.33) |
| <i>P</i> for trend                         |                           |          | .18             |                            | .42             | .20                                                                                          |                                              | <.001           |
| <b>Regular aspirin use</b>                 |                           |          |                 |                            |                 |                                                                                              |                                              |                 |
| No                                         | 37901                     | 845      | 1(ref)          | 1534                       | 1(ref)          | 1(ref)                                                                                       | 374                                          | 1(ref)          |
| Yes                                        | 36343                     | 776      | 0.97(0.88-1.08) | 1398                       | 0.95(0.88-1.03) | 1.02(0.90-1.16)                                                                              | 401                                          | 1.06(0.92-1.23) |
| <i>P</i>                                   |                           |          | .61             |                            | .22             | .74                                                                                          |                                              | .41             |
| <b>Total fiber intake</b>                  |                           |          |                 |                            |                 |                                                                                              |                                              |                 |

|                                         |       |     |                 |     |                 |                 |     |                 |
|-----------------------------------------|-------|-----|-----------------|-----|-----------------|-----------------|-----|-----------------|
| Quartile 1                              | 18370 | 486 | 1(ref)          | 780 | 1(ref)          | 1(ref)          | 236 | 1(ref)          |
| Quartile 2                              | 18501 | 402 | 0.96(0.84-1.10) | 780 | 1.06(0.96-1.18) | 0.90(0.76-1.07) | 214 | 1.04(0.86-1.26) |
| Quartile 3                              | 18585 | 418 | 1.08(0.95-1.24) | 712 | 0.99(0.88-1.10) | 1.10(0.92-1.31) | 188 | 0.99(0.81-1.20) |
| Quartile 4                              | 18788 | 315 | 0.92(0.79-1.07) | 660 | 0.96(0.85-1.07) | 0.96(0.79-1.16) | 137 | 0.83(0.67-1.03) |
| <i>P</i> for trend                      |       |     | .59             |     | .25             | .89             |     | .08             |
| <b>Total folate intake</b>              |       |     |                 |     |                 |                 |     |                 |
| Quartile 1                              | 18435 | 435 | 1(ref)          | 765 | 1(ref)          | 1(ref)          | 224 | 1(ref)          |
| Quartile 2                              | 18512 | 431 | 1.10(0.96-1.27) | 780 | 1.06(0.95-1.18) | 1.02(0.86-1.21) | 185 | 0.87(0.72-1.07) |
| Quartile 3                              | 18584 | 384 | 1.03(0.89-1.19) | 708 | 0.98(0.88-1.10) | 1.03(0.86-1.23) | 218 | 1.05(0.87-1.28) |
| Quartile 4                              | 18713 | 371 | 1.06(0.92-1.23) | 679 | 0.96(0.86-1.07) | 1.10(0.92-1.33) | 148 | 0.75(0.60-0.93) |
| <i>P</i> for trend                      |       |     | .67             |     | .22             | .29             |     | .03             |
| <b>Total calcium intake</b>             |       |     |                 |     |                 |                 |     |                 |
| Quartile 1                              | 18424 | 431 | 1(ref)          | 838 | 1(ref)          | 1(ref)          | 204 | 1(ref)          |
| Quartile 2                              | 18606 | 387 | 0.96(0.83-1.11) | 692 | 0.84(0.76-0.93) | 1.12(0.94-1.34) | 193 | 1.00(0.81-1.22) |
| Quartile 3                              | 18518 | 409 | 1.07(0.93-1.23) | 736 | 0.90(0.81-1.00) | 1.17(0.98-1.39) | 215 | 1.16(0.95-1.42) |
| Quartile 4                              | 18696 | 394 | 1.08(0.94-1.25) | 666 | 0.82(0.74-0.91) | 1.30(1.09-1.56) | 163 | 0.91(0.74-1.13) |
| <i>P</i> for trend                      |       |     | .14             |     | .003            | .004            |     | .54             |
| <b>Total vitamin D intake</b>           |       |     |                 |     |                 |                 |     |                 |
| Quartile 1                              | 18404 | 438 | 1(ref)          | 815 | 1(ref)          | 1(ref)          | 216 | 1(ref)          |
| Quartile 2                              | 18582 | 418 | 1.03(0.90-1.19) | 717 | 0.90(0.81-1.00) | 1.14(0.96-1.35) | 191 | 0.93(0.76-1.13) |
| Quartile 3                              | 18535 | 407 | 1.08(0.94-1.24) | 745 | 0.97(0.87-1.07) | 1.10(0.93-1.31) | 212 | 1.07(0.88-1.31) |
| Quartile 4                              | 18723 | 358 | 1.00(0.86-1.15) | 655 | 0.86(0.77-0.96) | 1.17(0.97-1.40) | 156 | 0.83(0.67-1.02) |
| <i>P</i> for trend                      |       |     | .98             |     | .02             | .15             |     | .17             |
| <b>Marine omega-3 fatty acid intake</b> |       |     |                 |     |                 |                 |     |                 |
| Quartile 1                              | 18317 | 450 | 1(ref)          | 836 | 1(ref)          | 1(ref)          | 211 | 1(ref)          |
| Quartile 2                              | 18573 | 422 | 0.97(0.84-1.11) | 738 | 0.90(0.81-1.00) | 1.05(0.89-1.25) | 225 | 1.06(0.88-1.29) |
| Quartile 3                              | 18616 | 406 | 0.98(0.85-1.12) | 695 | 0.89(0.80-0.98) | 1.10(0.92-1.30) | 172 | 0.86(0.70-1.05) |
| Quartile 4                              | 18738 | 343 | 0.90(0.78-1.04) | 663 | 0.88(0.79-0.98) | 1.02(0.85-1.22) | 167 | 0.91(0.74-1.11) |
| <i>P</i> for trend                      |       |     | .19             |     | .02             | .68             |     | .12             |
| <b>Processed red meat intake</b>        |       |     |                 |     |                 |                 |     |                 |
| Quartile 1                              | 19810 | 357 | 1(ref)          | 644 | 1(ref)          | 1(ref)          | 155 | 1(ref)          |
| Quartile 2                              | 17911 | 399 | 1.10(0.95-1.27) | 682 | 1.11(0.99-1.24) | 1.01(0.84-1.22) | 185 | 1.10(0.89-1.37) |
| Quartile 3                              | 18128 | 424 | 1.08(0.93-1.25) | 786 | 1.22(1.09-1.36) | 0.88(0.74-1.06) | 202 | 1.08(0.87-1.34) |
| Quartile 4                              | 18395 | 441 | 1.01(0.87-1.17) | 820 | 1.18(1.05-1.31) | 0.88(0.74-1.06) | 233 | 1.08(0.87-1.33) |
| <i>P</i> for trend                      |       |     | .74             |     | .009            | .10             |     | .71             |

Abbreviations: CRC, colorectal cancer; SP, serrated polyp; HPFS, the Health Professionals Follow-up Study; OR, odd ratio; CI, confidence interval; MET, metabolic equivalent task.

<sup>a</sup> Multivariable logistic regression model was used with adjustment for time period of endoscopy (in 2-year intervals), number of prior endoscopies (continuous), time in years since the most recent endoscopy (continuous), reason for endoscopy (routine screening or symptom), race (Caucasian or non-Caucasian), age (continuous, per 10 years), family history of colorectal cancer (yes or no), pack-years of smoking (continuous), body mass index (continuous), physical activity (median in each category), alcohol consumption (median in each category), height (continuous, per 10 cm), regular aspirin use (yes or no). For dietary factors, test for trend was conducted using the median of each quartile as a continuous variable.



**Supplementary table 5** Multivariable associations of CRC risk factors with risk of proximal and large ( $\geq 10$ mm) SPs in the NHS, NHS2 and HPFS <sup>a</sup>

| Risk factor                                | proximal and $\geq 10$ mm SPs |                 |
|--------------------------------------------|-------------------------------|-----------------|
|                                            | n                             | OR (95% CI)     |
| <b>Family history of colorectal cancer</b> |                               |                 |
| No                                         | 304                           | 1(ref)          |
| Yes                                        | 85                            | 1.53(1.19-1.97) |
| <i>P</i>                                   |                               | .001            |
| <b>Smoking status</b>                      |                               |                 |
| Never                                      | 202                           | 1(ref)          |
| Past smokers                               | 154                           | 1.16(0.93-1.44) |
| Current smokers                            | 33                            | 1.80(1.25-2.60) |
| <i>P</i> for trend                         |                               | .004            |
| <b>Body mass index, kg/m<sup>2</sup></b>   |                               |                 |
| <25                                        | 169                           | 1(ref)          |
| 25-29.9                                    | 115                           | 0.88(0.69-1.12) |
| $\geq 30$                                  | 105                           | 1.27(0.99-1.63) |
| <i>P</i> for trend                         |                               | .75             |
| <b>Physical activity, MET-hours/week</b>   |                               |                 |
| <7.5                                       | 83                            | 1(ref)          |
| 7.5-14.9                                   | 86                            | 0.91(0.67-1.23) |
| 15-29.9                                    | 112                           | 0.97(0.73-1.29) |
| 30-59.9                                    | 89                            | 1.27(0.93-1.72) |
| $\geq 60$                                  | 19                            | 0.99(0.60-1.64) |
| <i>P</i> for trend                         |                               | .21             |
| <b>Alcohol consumption, g/day</b>          |                               |                 |
| Never                                      | 65                            | 1(ref)          |
| <7 for men, <3.5 for women                 | 135                           | 1.02(0.75-1.37) |
| 7-13.9 for men, 3.5-6.9 for women          | 75                            | 1.42(1.01-1.99) |
| $\geq 14$ for men, $\geq 7$ for women      | 114                           | 1.48(1.08-2.03) |
| <i>P</i> for trend                         |                               | .002            |
| <b>Height, per 10cm</b>                    |                               |                 |
|                                            | 389                           | 1.24(1.07-1.44) |
| <i>P</i> for trend                         |                               | .005            |
| <b>Regular aspirin use</b>                 |                               |                 |
| No                                         | 299                           | 1(ref)          |
| Yes                                        | 90                            | 0.69(0.54-0.88) |
| <i>P</i>                                   |                               | .003            |
| <b>Total fiber intake</b>                  |                               |                 |
| Quartile 1                                 | 84                            | 1(ref)          |
| Quartile 2                                 | 101                           | 1.30(0.97-1.74) |
| Quartile 3                                 | 106                           | 1.38(1.02-1.85) |
| Quartile 4                                 | 98                            | 1.32(0.96-1.80) |
| <i>P</i> for trend                         |                               | .10             |
| <b>Total folate intake</b>                 |                               |                 |

|                                         |     |                 |
|-----------------------------------------|-----|-----------------|
| Quartile 1                              | 97  | 1(ref)          |
| Quartile 2                              | 102 | 1.17(0.88-1.55) |
| Quartile 3                              | 98  | 1.16(0.87-1.55) |
| Quartile 4                              | 92  | 1.10(0.82-1.46) |
| <i>P</i> for trend                      |     | .60             |
| <b>Total calcium intake</b>             |     |                 |
| Quartile 1                              | 98  | 1(ref)          |
| Quartile 2                              | 92  | 0.99(0.74-1.33) |
| Quartile 3                              | 100 | 1.13(0.84-1.51) |
| Quartile 4                              | 99  | 1.15(0.86-1.55) |
| <i>P</i> for trend                      |     | .25             |
| <b>Total vitamin D intake</b>           |     |                 |
| Quartile 1                              | 115 | 1(ref)          |
| Quartile 2                              | 103 | 0.96(0.73-1.25) |
| Quartile 3                              | 87  | 0.86(0.65-1.13) |
| Quartile 4                              | 84  | 0.86(0.64-1.14) |
| <i>P</i> for trend                      |     | .22             |
| <b>Marine omega-3 fatty acid intake</b> |     |                 |
| Quartile 1                              | 97  | 1(ref)          |
| Quartile 2                              | 107 | 1.13(0.86-1.49) |
| Quartile 3                              | 107 | 1.18(0.89-1.57) |
| Quartile 4                              | 78  | 0.92(0.67-1.27) |
| <i>P</i> for trend                      |     | .52             |
| <b>Processed red meat intake</b>        |     |                 |
| Quartile 1                              | 99  | 1(ref)          |
| Quartile 2                              | 108 | 1.11(0.84-1.46) |
| Quartile 3                              | 94  | 0.96(0.72-1.28) |
| Quartile 4                              | 88  | 0.85(0.63-1.15) |
| <i>P</i> for trend                      |     | .15             |

Abbreviations: CRC, colorectal cancer; SP, serrated polyp; NHS, the Nurses' Health Study; NHS2, the Nurses' Health Study 2; HPFS, the Health Professionals Follow-up Study; OR, odd ratio; CI, confidence interval; MET, metabolic equivalent task.

<sup>a</sup> Multivariable logistic regression model was used with adjustment for cohort (NHS, NHS2, HPFS), time period of endoscopy (in 2-year intervals), number of prior endoscopies (continuous), time in years since the most recent endoscopy (continuous), reason for endoscopy (routine screening or symptom), race (Caucasian or non-Caucasian), age (continuous, per 10 years), family history of colorectal cancer (yes or no), pack-years of smoking (continuous), body mass index (continuous), physical activity (median in each category), alcohol consumption (median in each category), height (continuous, per 10 cm), regular aspirin use (yes or no). For dietary factors, test for trend was conducted using the median of each quartile as a continuous variable.

**Supplementary table 6** Multivariable associations of CRC risk factors with risk of SPs and conventional adenomas after excluding mixed/serrated adenoma in the NHS, NHS2 and HPFS <sup>a</sup>

| Risk factor                                | Case-control comparison   |          |                 |                        |                 | Case-case comparison<br>(SPs-only compared to<br>conventional adenomas-<br>only) OR (95% CI) | Synchronous SPs and<br>conventional adenomas |                 |
|--------------------------------------------|---------------------------|----------|-----------------|------------------------|-----------------|----------------------------------------------------------------------------------------------|----------------------------------------------|-----------------|
|                                            | Non-polyp                 | SPs-only |                 | conventional adenomas- |                 |                                                                                              | n                                            | OR (95% CI)     |
|                                            | No. of person-endoscopies | n        | OR (95% CI)     | n                      | OR (95% CI)     |                                                                                              |                                              |                 |
| <b>Family history of colorectal cancer</b> |                           |          |                 |                        |                 |                                                                                              |                                              |                 |
| No                                         | 263164                    | 5212     | 1(ref)          | 7000                   | 1(ref)          | 1(ref)                                                                                       | 1726                                         | 1(ref)          |
| Yes                                        | 69036                     | 1771     | 1.52(1.44-1.61) | 2212                   | 1.46(1.39-1.54) | 1.00(0.93-1.08)                                                                              | 564                                          | 1.53(1.39-1.69) |
| <i>P</i>                                   |                           |          | <.001           |                        | <.001           | .97                                                                                          |                                              | <.001           |
| <b>Smoking status</b>                      |                           |          |                 |                        |                 |                                                                                              |                                              |                 |
| Never                                      | 181806                    | 3280     | 1(ref)          | 4889                   | 1(ref)          | 1(ref)                                                                                       | 925                                          | 1(ref)          |
| Past smokers                               |                           |          |                 |                        |                 |                                                                                              |                                              |                 |
| <30 pack-years                             | 109181                    | 2349     | 1.25(1.18-1.32) | 2983                   | 1.01(0.96-1.06) | 1.22(1.14-1.32)                                                                              | 803                                          | 1.35(1.23-1.49) |
| ≥30 pack-years                             | 24178                     | 623      | 1.71(1.56-1.87) | 833                    | 1.12(1.03-1.21) | 1.51(1.33-1.70)                                                                              | 289                                          | 1.86(1.62-2.15) |
| Current smokers                            |                           |          |                 |                        |                 |                                                                                              |                                              |                 |
| <30 pack-years                             | 7550                      | 310      | 1.83(1.62-2.06) | 193                    | 0.92(0.79-1.07) | 1.85(1.53-2.24)                                                                              | 87                                           | 2.19(1.75-2.74) |
| ≥30 pack-years                             | 9485                      | 421      | 2.41(2.17-2.68) | 314                    | 1.13(1.00-1.27) | 2.06(1.76-2.41)                                                                              | 186                                          | 3.44(2.93-4.05) |
| <i>P</i> for trend                         |                           |          | <.001           |                        | <.001           | <.001                                                                                        |                                              | <.001           |
| <b>Body mass index, kg/m<sup>2</sup></b>   |                           |          |                 |                        |                 |                                                                                              |                                              |                 |
| <25                                        | 147480                    | 2733     | 1(ref)          | 3823                   | 1(ref)          | 1(ref)                                                                                       | 797                                          | 1(ref)          |
| 25-29.9                                    | 116599                    | 2499     | 1.19(1.12-1.26) | 3470                   | 1.08(1.03-1.13) | 1.09(1.02-1.18)                                                                              | 908                                          | 1.34(1.21-1.47) |
| 30-34.9                                    | 44749                     | 1120     | 1.35(1.26-1.45) | 1302                   | 1.13(1.06-1.21) | 1.19(1.08-1.31)                                                                              | 377                                          | 1.59(1.40-1.80) |
| ≥35                                        | 23372                     | 631      | 1.37(1.25-1.50) | 617                    | 1.07(0.98-1.17) | 1.28(1.12-1.45)                                                                              | 208                                          | 1.86(1.59-2.18) |
| <i>P</i> for trend                         |                           |          | <.001           |                        | <.001           | <.001                                                                                        |                                              | <.001           |
| <b>Physical activity, MET-hours/week</b>   |                           |          |                 |                        |                 |                                                                                              |                                              |                 |
| <7.5                                       | 74745                     | 1601     | 1(ref)          | 2059                   | 1(ref)          | 1(ref)                                                                                       | 508                                          | 1(ref)          |
| 7.5-14.9                                   | 81188                     | 1868     | 1.16(1.08-1.24) | 2307                   | 1.05(0.99-1.12) | 1.12(1.02-1.23)                                                                              | 565                                          | 1.09(0.97-1.23) |
| 15-29.9                                    | 98136                     | 2013     | 1.08(1.01-1.15) | 2633                   | 0.97(0.92-1.03) | 1.15(1.05-1.26)                                                                              | 697                                          | 1.11(0.99-1.25) |
| 30-59.9                                    | 61101                     | 1210     | 1.08(1.00-1.17) | 1765                   | 0.99(0.93-1.06) | 1.12(1.01-1.25)                                                                              | 410                                          | 1.01(0.88-1.16) |
| ≥60                                        | 17030                     | 291      | 0.92(0.81-1.05) | 448                    | 0.87(0.78-0.97) | 1.12(0.95-1.33)                                                                              | 110                                          | 0.97(0.78-1.20) |
| <i>P</i> for trend                         |                           |          | .16             |                        | .005            | .15                                                                                          |                                              | .46             |
| <b>Alcohol consumption, g/day</b>          |                           |          |                 |                        |                 |                                                                                              |                                              |                 |
| Never                                      | 66463                     | 1251     | 1(ref)          | 1709                   | 1(ref)          | 1(ref)                                                                                       | 342                                          | 1(ref)          |
| <7 for men, <3.5 for women                 | 131654                    | 2746     | 1.18(1.10-1.26) | 3613                   | 1.08(1.02-1.15) | 1.09(1.00-1.20)                                                                              | 812                                          | 1.19(1.04-1.35) |
| 7-13.9 for men, 3.5-6.9 for women          | 53207                     | 1126     | 1.24(1.15-1.35) | 1477                   | 1.07(1.00-1.15) | 1.17(1.04-1.30)                                                                              | 401                                          | 1.44(1.24-1.67) |
| ≥14 for men, ≥7 for women                  | 80876                     | 1860     | 1.35(1.25-1.45) | 2413                   | 1.17(1.10-1.25) | 1.16(1.05-1.28)                                                                              | 735                                          | 1.66(1.45-1.90) |
| <i>P</i> for trend                         |                           |          | <.001           |                        | <.001           | .02                                                                                          |                                              | <.001           |
| <b>Height, per 10cm</b>                    |                           |          |                 |                        |                 |                                                                                              |                                              |                 |
|                                            | 332200                    | 6983     | 1.03(1.00-1.07) | 9212                   | 1.03(0.99-1.06) | 0.99(0.95-1.05)                                                                              | 2290                                         | 1.12(1.05-1.19) |
| <i>P</i> for trend                         |                           |          | .08             |                        | .10             | .84                                                                                          |                                              | .001            |
| <b>Regular aspirin use</b>                 |                           |          |                 |                        |                 |                                                                                              |                                              |                 |
| No                                         | 215497                    | 4800     | 1(ref)          | 5912                   | 1(ref)          | 1(ref)                                                                                       | 1432                                         | 1(ref)          |
| Yes                                        | 116703                    | 2183     | 0.96(0.91-1.01) | 3300                   | 0.96(0.92-1.00) | 1.01(0.93-1.08)                                                                              | 858                                          | 0.95(0.87-1.04) |
| <i>P</i>                                   |                           |          | .13             |                        | .08             | .89                                                                                          |                                              | .24             |

|                                         |       |      |                 |      |                 |                 |     |                 |  |
|-----------------------------------------|-------|------|-----------------|------|-----------------|-----------------|-----|-----------------|--|
| <b>Total fiber intake</b>               |       |      |                 |      |                 |                 |     |                 |  |
| Quartile 1                              | 82802 | 1955 | 1(ref)          | 2279 | 1(ref)          | 1(ref)          | 598 | 1(ref)          |  |
| Quartile 2                              | 83047 | 1838 | 1.05(0.98-1.12) | 2217 | 0.99(0.93-1.05) | 1.06(0.97-1.16) | 580 | 1.07(0.95-1.20) |  |
| Quartile 3                              | 82936 | 1727 | 1.04(0.97-1.11) | 2346 | 1.03(0.97-1.09) | 1.02(0.93-1.12) | 600 | 1.11(0.99-1.25) |  |
| Quartile 4                              | 83415 | 1463 | 0.96(0.89-1.04) | 2370 | 0.98(0.91-1.04) | 0.98(0.89-1.09) | 512 | 0.93(0.81-1.06) |  |
| <i>P</i> for trend                      |       |      | .27             |      | .61             | .55             |     | .28             |  |
| <b>Total folate intake</b>              |       |      |                 |      |                 |                 |     |                 |  |
| Quartile 1                              | 82759 | 1840 | 1(ref)          | 2388 | 1(ref)          | 1(ref)          | 629 | 1(ref)          |  |
| Quartile 2                              | 82649 | 1863 | 1.16(1.08-1.24) | 2460 | 1.07(1.01-1.14) | 1.08(0.98-1.18) | 614 | 1.03(0.92-1.16) |  |
| Quartile 3                              | 83260 | 1670 | 1.09(1.02-1.17) | 2249 | 1.01(0.95-1.07) | 1.07(0.98-1.18) | 532 | 0.93(0.83-1.05) |  |
| Quartile 4                              | 83532 | 1610 | 1.07(1.00-1.15) | 2115 | 0.93(0.87-0.99) | 1.16(1.05-1.28) | 515 | 0.91(0.80-1.03) |  |
| <i>P</i> for trend                      |       |      | .27             |      | .002            | .005            |     | .05             |  |
| <b>Total calcium intake</b>             |       |      |                 |      |                 |                 |     |                 |  |
| Quartile 1                              | 82432 | 1759 | 1(ref)          | 2603 | 1(ref)          | 1(ref)          | 695 | 1(ref)          |  |
| Quartile 2                              | 82846 | 1814 | 1.10(1.03-1.18) | 2458 | 1.02(0.96-1.08) | 1.07(0.98-1.17) | 586 | 0.94(0.84-1.05) |  |
| Quartile 3                              | 83078 | 1814 | 1.14(1.06-1.22) | 2218 | 0.98(0.92-1.04) | 1.15(1.05-1.26) | 560 | 0.97(0.87-1.09) |  |
| Quartile 4                              | 83844 | 1596 | 1.04(0.96-1.11) | 1933 | 0.90(0.85-0.96) | 1.15(1.05-1.27) | 449 | 0.86(0.76-0.97) |  |
| <i>P</i> for trend                      |       |      | .39             |      | <.001           | .002            |     | .03             |  |
| <b>Total vitamin D intake</b>           |       |      |                 |      |                 |                 |     |                 |  |
| Quartile 1                              | 82435 | 1937 | 1(ref)          | 2560 | 1(ref)          | 1(ref)          | 632 | 1(ref)          |  |
| Quartile 2                              | 82921 | 1818 | 1.02(0.95-1.09) | 2331 | 0.94(0.89-0.99) | 1.08(0.99-1.18) | 626 | 1.04(0.93-1.16) |  |
| Quartile 3                              | 83174 | 1690 | 1.01(0.94-1.08) | 2249 | 0.93(0.88-0.99) | 1.07(0.98-1.17) | 540 | 0.93(0.83-1.05) |  |
| Quartile 4                              | 83670 | 1538 | 0.95(0.89-1.02) | 2072 | 0.85(0.80-0.90) | 1.12(1.02-1.23) | 492 | 0.86(0.76-0.97) |  |
| <i>P</i> for trend                      |       |      | .13             |      | <.001           | .02             |     | .003            |  |
| <b>Marine omega-3 fatty acid intake</b> |       |      |                 |      |                 |                 |     |                 |  |
| Quartile 1                              | 82527 | 1960 | 1(ref)          | 2352 | 1(ref)          | 1(ref)          | 532 | 1(ref)          |  |
| Quartile 2                              | 83076 | 1852 | 1.01(0.94-1.07) | 2386 | 1.01(0.95-1.07) | 1.01(0.92-1.10) | 567 | 1.02(0.91-1.15) |  |
| Quartile 3                              | 83160 | 1736 | 0.99(0.93-1.06) | 2272 | 0.95(0.89-1.01) | 1.04(0.95-1.14) | 593 | 1.04(0.92-1.17) |  |
| Quartile 4                              | 83437 | 1435 | 0.89(0.83-0.95) | 2202 | 0.89(0.84-0.95) | 1.00(0.91-1.11) | 598 | 1.03(0.91-1.17) |  |
| <i>P</i> for trend                      |       |      | .002            |      | <.001           | .72             |     | .58             |  |
| <b>Processed red meat intake</b>        |       |      |                 |      |                 |                 |     |                 |  |
| Quartile 1                              | 85044 | 1601 | 1(ref)          | 2225 | 1(ref)          | 1(ref)          | 501 | 1(ref)          |  |
| Quartile 2                              | 81533 | 1748 | 1.09(1.02-1.17) | 2135 | 0.99(0.93-1.06) | 1.10(1.01-1.21) | 565 | 1.09(0.97-1.24) |  |
| Quartile 3                              | 83076 | 1742 | 1.03(0.96-1.10) | 2340 | 1.04(0.98-1.11) | 0.99(0.91-1.09) | 571 | 1.02(0.90-1.15) |  |
| Quartile 4                              | 82547 | 1892 | 1.06(0.99-1.14) | 2512 | 1.04(0.98-1.10) | 1.03(0.94-1.13) | 653 | 1.01(0.89-1.14) |  |
| <i>P</i> for trend                      |       |      | .40             |      | .13             | .85             |     | .65             |  |

Abbreviations: CRC, colorectal cancer; SP, serrated polyp; NHS, the Nurses' Health Study; NHS2, the Nurses' Health Study 2; HPFS, the Health Professionals Follow-up Study; OR, odd ratio; CI, confidence interval; MET, metabolic equivalent task.

<sup>a</sup> Multivariable logistic regression model was used with adjustment for cohort (NHS, NHS2, HPFS), time period of endoscopy (in 2-year intervals), number of prior endoscopies (continuous), time in years since the most recent endoscopy (continuous), reason for endoscopy (routine screening or symptom), race (Caucasian or non-Caucasian), age (continuous, per 10 years), family history of colorectal cancer (yes or no), pack-years of smoking (continuous), body mass index (continuous), physical activity (median in each category), alcohol consumption (median in each category), height (continuous, per 10 cm), regular aspirin use (yes or no). For dietary factors, test for trend was conducted using the median of each quartile as a continuous variable.

**Supplementary table 7** Multivariable associations of CRC risk factors with risk of SPs and conventional adenomas among participants who had colonoscopies in the NHS, NHS2 and HPFS <sup>a</sup>

| Risk factor                                | Case-control comparison                |          |                 |                            |                 | Case-case comparison<br>(SPs-only compared to<br>conventional adenomas-<br>only) OR (95% CI) | Synchronous SPs and<br>conventional adenomas |                 |  |
|--------------------------------------------|----------------------------------------|----------|-----------------|----------------------------|-----------------|----------------------------------------------------------------------------------------------|----------------------------------------------|-----------------|--|
|                                            | Non-polyp<br>No. of person-endoscopies | SPs-only |                 | conventional adenomas-only |                 |                                                                                              | n                                            | OR (95% CI)     |  |
|                                            |                                        | n        | OR (95% CI)     | n                          | OR (95% CI)     |                                                                                              |                                              |                 |  |
| <b>Family history of colorectal cancer</b> |                                        |          |                 |                            |                 |                                                                                              |                                              |                 |  |
| No                                         | 176555                                 | 4506     | 1(ref)          | 5277                       | 1(ref)          | 1(ref)                                                                                       | 1352                                         | 1(ref)          |  |
| Yes                                        | 47153                                  | 1438     | 1.29(1.22-1.38) | 1568                       | 1.26(1.19-1.33) | 1.02(0.94-1.12)                                                                              | 422                                          | 1.36(1.22-1.53) |  |
| <i>P</i>                                   |                                        |          | <.001           |                            | <.001           | .61                                                                                          |                                              | <.001           |  |
| <b>Smoking status</b>                      |                                        |          |                 |                            |                 |                                                                                              |                                              |                 |  |
| Never                                      | 125443                                 | 2866     | 1(ref)          | 3753                       | 1(ref)          | 1(ref)                                                                                       | 725                                          | 1(ref)          |  |
| Past smokers                               |                                        |          |                 |                            |                 |                                                                                              |                                              |                 |  |
| <30 pack-years                             | 72979                                  | 2026     | 1.27(1.20-1.35) | 2207                       | 1.00(0.94-1.06) | 1.25(1.15-1.36)                                                                              | 633                                          | 1.39(1.25-1.55) |  |
| ≥30 pack-years                             | 14931                                  | 459      | 1.59(1.43-1.77) | 537                        | 1.06(0.96-1.16) | 1.49(1.30-1.72)                                                                              | 201                                          | 1.86(1.57-2.20) |  |
| Current smokers                            |                                        |          |                 |                            |                 |                                                                                              |                                              |                 |  |
| <30 pack-years                             | 4772                                   | 260      | 1.86(1.63-2.13) | 146                        | 0.95(0.80-1.12) | 1.87(1.51-2.32)                                                                              | 71                                           | 2.33(1.82-2.99) |  |
| ≥30 pack-years                             | 5583                                   | 333      | 2.49(2.21-2.81) | 202                        | 1.08(0.94-1.26) | 2.18(1.81-2.62)                                                                              | 144                                          | 3.87(3.22-4.65) |  |
| <i>P</i> for trend                         |                                        |          | <.001           |                            | .18             | <.001                                                                                        |                                              | <.001           |  |
| <b>Body mass index, kg/m<sup>2</sup></b>   |                                        |          |                 |                            |                 |                                                                                              |                                              |                 |  |
| <25                                        | 95872                                  | 2286     | 1(ref)          | 2858                       | 1(ref)          | 1(ref)                                                                                       | 613                                          | 1(ref)          |  |
| 25-29.9                                    | 77889                                  | 2108     | 1.19(1.12-1.26) | 2545                       | 1.05(0.99-1.11) | 1.11(1.03-1.21)                                                                              | 672                                          | 1.28(1.15-1.44) |  |
| 30-34.9                                    | 32191                                  | 1001     | 1.36(1.26-1.47) | 963                        | 1.04(0.96-1.12) | 1.30(1.17-1.45)                                                                              | 312                                          | 1.60(1.39-1.84) |  |
| ≥35                                        | 17756                                  | 549      | 1.31(1.19-1.44) | 479                        | 0.99(0.89-1.09) | 1.31(1.14-1.51)                                                                              | 177                                          | 1.84(1.55-2.19) |  |
| <i>P</i> for trend                         |                                        |          | <.001           |                            | .22             | <.001                                                                                        |                                              | <.001           |  |
| <b>Physical activity, MET-hours/week</b>   |                                        |          |                 |                            |                 |                                                                                              |                                              |                 |  |
| <7.5                                       | 48549                                  | 1289     | 1(ref)          | 1474                       | 1(ref)          | 1(ref)                                                                                       | 376                                          | 1(ref)          |  |
| 7.5-14.9                                   | 55487                                  | 1627     | 1.20(1.11-1.29) | 1750                       | 1.07(0.99-1.15) | 1.15(1.03-1.27)                                                                              | 440                                          | 1.11(0.96-1.27) |  |
| 15-29.9                                    | 67389                                  | 1734     | 1.09(1.01-1.18) | 2025                       | 0.99(0.93-1.06) | 1.14(1.03-1.26)                                                                              | 554                                          | 1.16(1.01-1.33) |  |
| 30-59.9                                    | 41149                                  | 1038     | 1.11(1.01-1.21) | 1279                       | 0.97(0.89-1.05) | 1.16(1.03-1.30)                                                                              | 328                                          | 1.08(0.93-1.27) |  |
| ≥60                                        | 11134                                  | 256      | 1.00(0.87-1.15) | 317                        | 0.84(0.74-0.96) | 1.24(1.03-1.50)                                                                              | 76                                           | 0.93(0.72-1.19) |  |
| <i>P</i> for trend                         |                                        |          | .63             |                            | .001            | .03                                                                                          |                                              | .65             |  |
| <b>Alcohol consumption, g/day</b>          |                                        |          |                 |                            |                 |                                                                                              |                                              |                 |  |
| Never                                      | 43367                                  | 1043     | 1(ref)          | 1245                       | 1(ref)          | 1(ref)                                                                                       | 251                                          | 1(ref)          |  |
| <7 for men, <3.5 for women                 | 90723                                  | 2355     | 1.17(1.08-1.26) | 2720                       | 1.08(1.01-1.16) | 1.07(0.96-1.18)                                                                              | 651                                          | 1.26(1.08-1.46) |  |
| 7-13.9 for men, 3.5-6.9 for women          | 35985                                  | 985      | 1.28(1.17-1.40) | 1113                       | 1.10(1.01-1.19) | 1.17(1.03-1.32)                                                                              | 291                                          | 1.42(1.19-1.69) |  |
| ≥14 for men, ≥7 for women                  | 53633                                  | 1561     | 1.36(1.25-1.48) | 1767                       | 1.19(1.10-1.28) | 1.14(1.01-1.28)                                                                              | 581                                          | 1.82(1.56-2.13) |  |
| <i>P</i> for trend                         |                                        |          | <.001           |                            | <.001           | .05                                                                                          |                                              | <.001           |  |
| <b>Height, per 10cm</b>                    |                                        |          |                 |                            |                 |                                                                                              |                                              |                 |  |
|                                            | 223708                                 | 5944     | 1.04(1.00-1.09) | 6845                       | 1.04(1.00-1.08) | 1.01(0.95-1.07)                                                                              | 1774                                         | 1.10(1.02-1.18) |  |
| <i>P</i> for trend                         |                                        |          | .04             |                            | .07             | .74                                                                                          |                                              | .01             |  |
| <b>Regular aspirin use</b>                 |                                        |          |                 |                            |                 |                                                                                              |                                              |                 |  |
| No                                         | 149424                                 | 4200     | 1(ref)          | 4502                       | 1(ref)          | 1(ref)                                                                                       | 1144                                         | 1(ref)          |  |
| Yes                                        | 74284                                  | 1744     | 0.94(0.89-1.00) | 2343                       | 0.97(0.92-1.02) | 0.97(0.89-1.05)                                                                              | 630                                          | 0.95(0.85-1.05) |  |
| <i>P</i>                                   |                                        |          | .06             |                            | .22             | .44                                                                                          |                                              | .29             |  |

|                                         |       |      |                 |      |                 |                 |     |                 |  |
|-----------------------------------------|-------|------|-----------------|------|-----------------|-----------------|-----|-----------------|--|
| <b>Total fiber intake</b>               |       |      |                 |      |                 |                 |     |                 |  |
| Quartile 1                              | 52785 | 1595 | 1(ref)          | 1620 | 1(ref)          | 1(ref)          | 450 | 1(ref)          |  |
| Quartile 2                              | 56745 | 1530 | 1.02(0.95-1.10) | 1677 | 1.03(0.96-1.10) | 1.01(0.91-1.11) | 463 | 1.12(0.98-1.28) |  |
| Quartile 3                              | 57976 | 1514 | 1.05(0.97-1.13) | 1807 | 1.08(1.00-1.16) | 0.98(0.88-1.09) | 486 | 1.18(1.03-1.35) |  |
| Quartile 4                              | 56202 | 1305 | 1.01(0.93-1.09) | 1741 | 1.02(0.94-1.10) | 1.00(0.90-1.12) | 375 | 0.94(0.81-1.10) |  |
| <i>P</i> for trend                      |       |      | .78             |      | .57             | .97             |     | .48             |  |
| <b>Total folate intake</b>              |       |      |                 |      |                 |                 |     |                 |  |
| Quartile 1                              | 43887 | 1335 | 1(ref)          | 1515 | 1(ref)          | 1(ref)          | 432 | 1(ref)          |  |
| Quartile 2                              | 55581 | 1614 | 1.18(1.09-1.27) | 1858 | 1.10(1.02-1.18) | 1.07(0.96-1.19) | 476 | 1.01(0.88-1.15) |  |
| Quartile 3                              | 61189 | 1530 | 1.11(1.03-1.20) | 1787 | 1.03(0.96-1.11) | 1.07(0.96-1.19) | 440 | 0.92(0.81-1.06) |  |
| Quartile 4                              | 63051 | 1465 | 1.07(0.99-1.16) | 1685 | 0.95(0.88-1.02) | 1.15(1.03-1.28) | 426 | 0.90(0.78-1.04) |  |
| <i>P</i> for trend                      |       |      | .50             |      | .01             | .02             |     | .08             |  |
| <b>Total calcium intake</b>             |       |      |                 |      |                 |                 |     |                 |  |
| Quartile 1                              | 46692 | 1338 | 1(ref)          | 1713 | 1(ref)          | 1(ref)          | 483 | 1(ref)          |  |
| Quartile 2                              | 54403 | 1497 | 1.07(0.99-1.16) | 1799 | 1.02(0.96-1.10) | 1.06(0.95-1.17) | 462 | 0.96(0.84-1.09) |  |
| Quartile 3                              | 59185 | 1631 | 1.14(1.06-1.23) | 1746 | 1.01(0.94-1.08) | 1.15(1.03-1.27) | 446 | 0.96(0.84-1.10) |  |
| Quartile 4                              | 63428 | 1478 | 1.04(0.96-1.12) | 1587 | 0.94(0.87-1.01) | 1.12(1.01-1.25) | 383 | 0.88(0.76-1.02) |  |
| <i>P</i> for trend                      |       |      | .41             |      | .04             | .02             |     | .10             |  |
| <b>Total vitamin D intake</b>           |       |      |                 |      |                 |                 |     |                 |  |
| Quartile 1                              | 49349 | 1549 | 1(ref)          | 1762 | 1(ref)          | 1(ref)          | 461 | 1(ref)          |  |
| Quartile 2                              | 55789 | 1550 | 1.00(0.93-1.08) | 1762 | 0.96(0.90-1.03) | 1.04(0.94-1.15) | 515 | 1.09(0.96-1.24) |  |
| Quartile 3                              | 59568 | 1544 | 1.02(0.95-1.10) | 1734 | 0.94(0.88-1.01) | 1.09(0.98-1.20) | 408 | 0.88(0.76-1.00) |  |
| Quartile 4                              | 59002 | 1301 | 0.92(0.85-0.99) | 1587 | 0.88(0.82-0.94) | 1.05(0.95-1.17) | 390 | 0.89(0.77-1.02) |  |
| <i>P</i> for trend                      |       |      | .03             |      | <.001           | .30             |     | .01             |  |
| <b>Marine omega-3 fatty acid intake</b> |       |      |                 |      |                 |                 |     |                 |  |
| Quartile 1                              | 56981 | 1703 | 1(ref)          | 1788 | 1(ref)          | 1(ref)          | 428 | 1(ref)          |  |
| Quartile 2                              | 56589 | 1573 | 0.99(0.92-1.06) | 1816 | 1.02(0.96-1.09) | 0.98(0.89-1.08) | 442 | 1.00(0.88-1.15) |  |
| Quartile 3                              | 55604 | 1487 | 1.02(0.95-1.10) | 1668 | 0.96(0.89-1.03) | 1.06(0.96-1.17) | 447 | 1.03(0.90-1.18) |  |
| Quartile 4                              | 54534 | 1181 | 0.90(0.83-0.98) | 1573 | 0.90(0.84-0.97) | 1.00(0.89-1.11) | 457 | 1.08(0.94-1.24) |  |
| <i>P</i> for trend                      |       |      | .05             |      | .001            | .66             |     | .27             |  |
| <b>Processed red meat intake</b>        |       |      |                 |      |                 |                 |     |                 |  |
| Quartile 1                              | 55815 | 1370 | 1(ref)          | 1654 | 1(ref)          | 1(ref)          | 372 | 1(ref)          |  |
| Quartile 2                              | 56558 | 1493 | 1.06(0.99-1.15) | 1647 | 0.99(0.93-1.07) | 1.07(0.97-1.19) | 461 | 1.15(1.00-1.32) |  |
| Quartile 3                              | 57260 | 1524 | 1.03(0.96-1.11) | 1754 | 1.02(0.95-1.10) | 1.02(0.92-1.13) | 458 | 1.05(0.91-1.21) |  |
| Quartile 4                              | 54075 | 1557 | 1.05(0.97-1.13) | 1790 | 1.01(0.94-1.09) | 1.04(0.94-1.15) | 483 | 1.00(0.87-1.16) |  |
| <i>P</i> for trend                      |       |      | .47             |      | .59             | .77             |     | .43             |  |

Abbreviations: CRC, colorectal cancer; SP, serrated polyp; NHS, the Nurses' Health Study; NHS2, the Nurses' Health Study 2; HPFS, the Health Professionals Follow-up Study; OR, odd ratio; CI, confidence interval; MET, metabolic equivalent task.

<sup>a</sup> Multivariable logistic regression model was used with adjustment for cohort (NHS, NHS2, HPFS), time period of endoscopy (in 2-year intervals), number of prior endoscopies (continuous), time in years since the most recent endoscopy (continuous), reason for endoscopy (routine screening or symptom), race (Caucasian or non-Caucasian), age (continuous, per 10 years), family history of colorectal cancer (yes or no), pack-years of smoking (continuous), body mass index (continuous), physical activity (median in each category), alcohol consumption (median in each category), height (continuous, per 10 cm), regular aspirin use (yes or no). For dietary factors, test for trend was conducted using the median of each quartile as a continuous variable.
